# Supplementary material
Source: MDPI journal article supplement (https://www.mdpi.com/2073-4395/12/10/2514)
Supplement: s1 [file s1]

**Table S1.** VOCs analysis of “Elide” cultivar; ID is the identifier of the VOC and annotation specifies its chemical name; data are reported as median [5th percentile-95th percentile]; p is the p-value of the pair comparison calculated by LME; \* is used to indicate significant differences applying Bonferroni correction with  $\alpha=0.05$ .

| Metabolites                | Cod e | PE                     | N5                     | N18                    | p N5 vs PE | p N18 vs PE | p N5 vs N18 |
|----------------------------|-------|------------------------|------------------------|------------------------|------------|-------------|-------------|
| Ethyl acetate              | E1    | 656.5 [643.2-658.6]    | 606.7 [599.6-613.6]    | 1027.9 [1023.1-1032.7] | 1,60E-03   | 2,70E-07 *  | 9,09E-08 *  |
| Methyl propionate          | E2    | 69.0 [44.9-69.2]       | 43.5 [43.0-43.8]       | 94.0 [92.7-95.1]       | 9,32E-02   | 1,49E-02    | 1,23E-07 *  |
| Methyl butyrate            | E3    | 282.5 [281.1-284.1]    | 320.0 [318.2-321.8]    | 563.2 [558.8-567.7]    | 4,45E-06 * | 4,17E-08 *  | 9,01E-08 *  |
| Methyl 2-methylbutyrate    | E4    | 20.0 [11.6-20.1]       | 0.7 [0.6-0.7]          | 17.8 [17.8-17.9]       | 4,16E-03   | 8,47E-01    | 1,06E-11 *  |
| Methyl 3-methylbutyrate    | E5    | 25.0 [19.6-26.4]       | 23.8 [23.1-24.5]       | 25.4 [25.3-25.5]       | 9,71E-01   | 4,52E-01    | 1,41E-02    |
| Ethyl butyrate             | E6    | 2374.2 [2318.9-2381.7] | 2469.4 [2447.8-2491.7] | 2591.5 [2586.0-2597.6] | 8,00E-03   | 2,72E-04    | 5,96E-04    |
| Ethyl 2-methylbutyrate     | E7    | 256.3 [256.2-269.2]    | 253.9 [250.8-256.9]    | 547.5 [540.2-552.5]    | 2,20E-01   | 2,98E-07 *  | 2,37E-08 *  |
| Ethyl 3-methylbutyrate     | E8    | 110.6 [93.6-110.7]     | 88.6 [87.8-89.5]       | 132.6 [132.0-132.9]    | 4,54E-02   | 8,37E-03    | 5,70E-08 *  |
| Butyl acetate              | E9    | 36.3 [36.0-36.9]       | 60.6 [59.9-61.3]       | 82.1 [81.3-83.0]       | 3,35E-07 * | 7,90E-08 *  | 3,73E-06 *  |
| Isoamyl acetate            | E10   | 42.1 [41.3-42.3]       | 42.3 [41.9-42.9]       | 42.7 [42.4-43.1]       | 1,33E-01   | 1,64E-02    | 1,27E-01    |
| Ethyl pentanoate           | E11   | 22.4 [21.9-23.0]       | 23.4 [23.2-23.6]       | 33.8 [33.4-34.0]       | 2,13E-02   | 1,49E-06 *  | 1,10E-07 *  |
| trans-Ethyl-2-butenolate   | E12   | 70.3 [69.2-71.3]       | 67.6 [67.5-67.7]       | 107.9 [107.4-108.2]    | 1,19E-02   | 4,72E-07 *  | 2,34E-09 *  |
| Pentyl acetate             | E13   | 45.2 [45.1-45.8]       | 33.1 [32.9-33.3]       | 42.2 [41.7-42.6]       | 7,80E-07 * | 5,67E-04    | 3,37E-06 *  |
| Methyl hexanoate           | E14   | 894.6 [860.9-1006.8]   | 1311.5 [1298.2-1324.6] | 2544.3 [2523.4-2565.6] | 8,62E-04   | 3,40E-06 *  | 1,02E-07 *  |
| Ethyl hexanoate            | E15   | 2854.9 [2803.1-2859.8] | 3292.7 [3287.6-3300.8] | 5683.0 [5651.1-5717.3] | 1,49E-05 * | 3,86E-08 *  | 2,13E-08 *  |
| Isoamyl butyrate           | E16   | 5.2 [4.9-5.3]          | 7.1 [6.9-7.2]          | 0.6 [0.6-0.6]          | 9,42E-05 * | 1,10E-06 *  | 1,79E-07 *  |
| Hexyl acetate              | E17   | 1917.6 [1913.6-1927.6] | 1082.2 [1059.3-1106.5] | 1130.7 [1119.5-1142.2] | 4,11E-07 * | 4,01E-08 *  | 2,91E-02    |
| Methyl 2-hexenoate         | E18   | 8.7 [8.7-9.4]          | 10.4 [9.8-11.0]        | 21.8 [21.4-22.2]       | 2,79E-02   | 2,72E-06 *  | 1,03E-05 *  |
| cis-3-Hexen-1-ol acetate   | E19   | 366.2 [365.5-370.7]    | 176.5 [175.4-176.8]    | 173.4 [172.0-175.0]    | 3,11E-08 * | 4,37E-08 *  | 2,77E-02    |
| trans-2-Hexen-1-ol acetate | E20   | 8030.6 [8002.0-8070.6] | 4939.9 [4904.7-4973.9] | 4262.5 [4240.3-4289.1] | 2,94E-08 * | 6,53E-09 *  | 7,21E-06 *  |
| Ethyl 2-hexenoate          | E21   | 71.2 [70.8-71.4]       | 478.4 [472.8-484.1]    | 125.5 [125.1-125.9]    | 2,14E-08 * | 4,22E-09 *  | 3,81E-08 *  |

|                                  |      |                     |                        |                        |            |            |            |
|----------------------------------|------|---------------------|------------------------|------------------------|------------|------------|------------|
| Methyl octanoate                 | E22  | 22.1 [21.8-24.5]    | 27.9 [27.1-28.7]       | 67.7 [66.9-68.1]       | 6,22E-03   | 8,76E-07 * | 1,82E-07 * |
| Hexyl isobutyrate                | E23  | 53.0 [52.9-55.8]    | 46.8 [46.6-47.0]       | 46.4 [46.0-46.8]       | 1,70E-03   | 1,55E-03   | 2,30E-01   |
| Hexyl butyrate                   | E24  | 0 [0-0]             | 44.2 [44.0-44.4]       | 98.5 [98.3-98.6]       | 1,17E-10 * | 2,03E-12 * | 1,41E-10 * |
| Ethyl octanoate                  | E25  | 48.9 [45.5-49.4]    | 49.0 [48.9-49.2]       | 163.0 [162.1-163.3]    | 4,07E-01   | 7,22E-08 * | 1,37E-10 * |
| trans-2-Hexenyl butyrate         | E26  | 174.8 [174.3-175.2] | 155.4 [154.6-156.2]    | 260.1 [256.4-263.8]    | 1,79E-06 * | 2,28E-06 * | 1,10E-06 * |
| Ethyl 3-hydroxybutyrate          | E27  | 22.3 [22.2-23.7]    | 10.2 [10.1-10.4]       | 28.9 [28.1-29.8]       | 1,44E-05 * | 8,45E-04   | 2,68E-06 * |
| Methyl 3-(methylthio) propionate | E28  | 84.7 [19.9-85.0]    | 20.8 [20.7-20.9]       | 34.6 [33.8-35.4]       | 1,22E-01   | 2,57E-01   | 7,65E-06 * |
| Ethyl-3-methyl thiopropionate    | E29  | 36.8 [36.7-87.1]    | 24.2 [23.8-24.6]       | 132.0 [131.9-133.2]    | 1,56E-01   | 9,32E-03   | 2,90E-10 * |
| Ethyl 2-hydroxyhexanoate         | E30  | 35.0 [33.0-36.0]    | 120.8 [119.6-121.8]    | 37.8 [37.5-38.1]       | 1,16E-07 * | 2,00E-02   | 1,84E-08 * |
| Hexyl hexanoate                  | E31  | 45.6 [45.2-48.5]    | 32.0 [30.5-33.3]       | 97.7 [97.4-98.0]       | 2,84E-04   | 8,32E-07 * | 8,71E-08 * |
| Methyl 3-hydroxyhexanoate        | E32  | 0 [0-0]             | 49.9 [49.6-50.1]       | 35.6 [35.5-35.7]       | 1,15E-10 * | 8,62E-12 * | 2,21E-08 * |
| Ethyl 3-hydroxyhexanoate         | E33  | 60.3 [60.1-60.4]    | 67.4 [67.0-67.9]       | 133.4 [133.1-133.8]    | 5,51E-06 * | 1,73E-10 * | 1,23E-09 * |
| Benzyl acetate                   | E34  | 226.8 [226.2-232.1] | 0 [0-0]                | 0 [0-0]                | 2,40E-08 * | 2,40E-08 * | 1,00E+00   |
| Ethyl cinnamate                  | E35  | 3.8 [3.8-3.8]       | 153.7 [153.6-153.8]    | 8550.9 [1143.2-8587.6] | 4,87E-14 * | 1,13E-02   | 1,22E-02   |
| Hexanal                          | Ald1 | 46.1 [45.7-46.4]    | 42.7 [42.1-42.7]       | 504.8 [503.8-506.1]    | 2,33E-05 * | 9,03E-12 * | 8,04E-12 * |
| 2-Hexenal                        | Ald2 | 930.8 [928.4-953.2] | 1850.5 [1840.7-1859.5] | 3972.7 [3966.5-3981.9] | 5,85E-08 * | 3,82E-10 * | 3,34E-10 * |
| Nonanal                          | Ald3 | 14.5 [12.6-14.6]    | 19.9 [19.6-20.1]       | 29.3 [29.0-29.7]       | 8,14E-04   | 2,07E-05 * | 2,63E-06 * |
| Benzaldehyde                     | Ald4 | 30.9 [30.6-33.8]    | 47.4 [46.9-47.9]       | 200.1 [199.5-201.6]    | 1,23E-04 * | 8,86E-09 * | 3,16E-10 * |
| Dodecanal                        | Ald5 | 253.9 [226.2-254.1] | 111.5 [109.4-113.5]    | 316.1 [315.8-317.6]    | 1,41E-04 * | 1,50E-03   | 7,04E-09 * |
| Tetradecanal                     | Ald6 | 55.6 [55.0-55.8]    | 40.0 [39.4-40.5]       | 9.9 [9.9-9.9]          | 1,98E-06 * | 3,95E-09 * | 5,19E-08 * |
| Hexanol                          | Al1  | 413.2 [409.0-415.5] | 541.3 [540.7-542.6]    | 1085.5 [1084.0-1087.3] | 2,42E-07 * | 4,34E-10 * | 4,60E-11 * |
| trans-3-Hexen-1-ol               | Al2  | 25.4 [24.3-25.5]    | 20.4 [20.0-20.9]       | 21.5 [21.3-21.6]       | 5,35E-04   | 8,19E-04   | 1,43E-02   |
| cis-3-Hexen-1-ol                 | Al3  | 15.6 [15.5-15.7]    | 34.9 [34.3-35.5]       | 37.6 [37.5-37.7]       | 5,37E-07 * | 2,55E-10 * | 1,35E-03   |
| trans-2-Hexen-1-ol               | Al4  | 900.6 [898.1-989.7] | 1285.2 [1277.4-1292.7] | 2291.7 [2290.8-2292.8] | 2,86E-04   | 1,34E-06 * | 1,80E-09 * |
| Octanol                          | Al5  | 8.2 [8.1-8.8]       | 9.7 [9.0-10.4]         | 20.4 [20.0-20.8]       | 4,17E-02   | 2,59E-06 * | 1,90E-05 * |
| Propanoic acid                   | Ac1  | 9.0 [8.3-9.1]       | 7.2 [7.2-7.2]          | 32.5 [32.2-32.8]       | 2,62E-03   | 1,11E-07 * | 5,43E-09 * |
| Butyric acid                     | Ac3  | 26.4 [24.3-26.4]    | 16.3 [16.0-16.5]       | 58.2 [58.0-58.5]       | 1,73E-04 * | 1,26E-06 * | 2,71E-09 * |
| 2-Methylbutanoic acid            | Ac4  | 330.6 [328.2-331.1] | 367.5 [365.4-369.5]    | 1090.9 [1083.1-        | 1,01E-05 * | 5,39E-09 * | 6,95E-09 * |

|                     |     |                        |                        |                        |              |            |            |
|---------------------|-----|------------------------|------------------------|------------------------|--------------|------------|------------|
|                     |     |                        |                        | 1098.1]                |              |            |            |
| Hexanoic acid       | Ac5 | 503.0 [500.6-521.8]    | 814.6 [812.1-816.4]    | 16.1 [16.0-16.1]       | 1,38E-06 *   | 1,98E-07 * | 1,34E-11 * |
| Heptanoic acid      | Ac6 | 6.7 [6.6-7.0]          | 6.4 [6.4-6.5]          | 0 [0-0]                | 2,85E-02     | 2,59E-07 * | 5,19E-10 * |
| Octanoic acid       | Ac7 | 31.8 [29.6-31.9]       | 23.7 [23.7-23.8]       | 29.1 [28.1-30.1]       | 6,33E-04     | 9,53E-02   | 6,07E-04   |
| Nonanoic acid       | Ac8 | 32.3 [31.7-32.5]       | 49.9 [49.7-50.2]       | 208.7 [208.6-208.9]    | 3,42E-07 *   | 2,44E-11 * | 1,46E-12 * |
| Decanoic acid       | Ac9 | 11.5 [11.5-13.0]       | 12.7 [12.7-12.8]       | 0 [0-0]                | 2,11E-01     | 1,87E-05 * | 1,53E-10 * |
| β-Pinene            | T1  | 15.3 [14.2-15.3]       | 0.2 [0.2-0.2]          | 23.6 [23.2-24.0]       | 1,77E-06 *   | 2,71E-05 * | 3,74E-08 * |
| cis Linalol oxide   | T2  | 16.3 [16.1-16.4]       | 10.7 [10.6-10.7]       | 26.1 [26.0-26.3]       | 1,20E-07 *   | 3,00E-08 * | 2,74E-09 * |
| trans Linalol oxide | T3  | 0 [0-0]                | 14.1 [13.1-14.3]       | 0 [0-0]                | 3,95E-07 *   | 1,00E+00   | 3,95E-07 * |
| Linalool            | T4  | 1854.7 [1849.7-1892.6] | 1419.6 [1417.0-1420.6] | 2952.4 [2942.6-2960.9] | 4,26E-06 *   | 1,52E-07 * | 4,52E-10 * |
| β-Farnesene         | T5  | 12.4 [12.4-14.0]       | 12.7 [12.7-12.8]       | 46.8 [46.1-47.5]       | 7,34E-01     | 8,25E-07 * | 9,87E-08 * |
| α-Terpineol         | T6  | 140.6 [139.2-141.3]    | 194.5 [191.0-198.2]    | 364.2 [363.4-365.2]    | 1,33E-05 *   | 5,66E-10 * | 1,33E-07 * |
| β-Damascenone       | T7  | 0 [0-0]                | 0 [0-0]                | 2802.6 [2798.8-2807.5] | 1,00E+0<br>0 | 4,17E-13 * | 4,17E-13 * |
| Nerolidol           | T8  | 523.8 [519.6-576.0]    | 977.3 [968.4-979.0]    | 51.9 [51.8-52.0]       | 1,61E-05 *   | 1,01E-05 * | 1,05E-10 * |
| Mesifuranne         | F1  | 0 [0-0]                | 13.5 [13.1-14.0]       | 21.6 [21.3-21.9]       | 5,81E-07 *   | 2,59E-08 * | 1,07E-05 * |
| Furaneol            | F2  | 89.2 [88.8-91.0]       | 174.1 [172.8-175.4]    | 2872.1 [2855.7-2890.4] | 1,02E-07 *   | 7,76E-10 * | 8,79E-10 * |
| γ-Jasmolactone      | F3  | 23.1 [22.9-23.3]       | 39.8 [38.9-40.0]       | 0 [0-0]                | 2,12E-07 *   | 5,70E-10 * | 5,17E-09 * |
| γ-Octalactone       | L1  | 11.0 [11.0-12.0]       | 12.5 [12.2-12.8]       | 0 [0-0]                | 3,38E-02     | 5,07E-06 * | 1,65E-07 * |
| γ-Decalactone       | L2  | 1207.7 [1204.6-1295.3] | 2534.8 [2486.8-2548.2] | 0 [0-0]                | 1,77E-06 *   | 1,92E-06 * | 2,04E-09 * |
| γ-Dodecalactone     | L3  | 23.8 [23.7-24.3]       | 121.0 [120.9-121.7]    | 0 [0-0]                | 1,69E-10 *   | 7,77E-09 * | 2,44E-11 * |
| Phenol              | O1  | 10.9 [10.9-11.5]       | 13.4 [13.4-13.5]       | 278.9 [278.3-279.6]    | 2,39E-04 *   | 2,94E-11 * | 1,87E-11 * |

**Table S2.** VOCs analysis of “Sabrina” cultivar; ID is the identifier of the VOC and annotation specifies its chemical name; data are reported as median [5th percentile-95th percentile]; p is the p-value of the pair comparison calculated by LME; \* is used to indicate significant differences applying Bonferroni correction with  $\alpha=0.05$ .

| Metabolites                | Cod e | PE                     | N18                    | N5                     | p N5 vs PE | p N18 vs PE | p N5 vs N18 |
|----------------------------|-------|------------------------|------------------------|------------------------|------------|-------------|-------------|
| Ethyl acetate              | E1    | 100.4 [100.1-100.6]    | 436.0 [431.4-440.7]    | 55.9 [54.2-57.4]       | 9,10E-07 * | 2,31E-08 *  | 1,72E-08 *  |
| Methyl propionate          | E2    | 14.2 [14.1-14.5]       | 29.5 [29.1-29.8]       | 6.0 [5.8-6.3]          | 3,69E-07 * | 9,60E-08 *  | 1,97E-08 *  |
| Methyl butyrate            | E3    | 132.3 [131.3-133.3]    | 511.2 [508.7-513.2]    | 80.4 [78.1-88.8]       | 1,27E-05 * | 3,66E-10 *  | 2,97E-09 *  |
| Methyl 3-methylbutyrate    | E5    | 4.6 [4.3-4.9]          | 20.6 [19.5-21.7]       | 6.9 [6.5-8.5]          | 4,30E-03   | 1,39E-05 *  | 5,22E-05 *  |
| Ethyl butyrate             | E6    | 1443.5 [1440.2-1445.2] | 3048.8 [3043.7-3062.7] | 393.5 [390.1-397.1]    | 7,79E-11 * | 2,29E-10 *  | 3,80E-11 *  |
| Ethyl 2-methylbutyrate     | E7    | 59.0 [58.4-59.7]       | 243.8 [241.3-246.8]    | 43.0 [40.3-45.7]       | 5,34E-04   | 2,35E-08 *  | 7,20E-08 *  |
| Ethyl 3-methylbutyrate     | E8    | 39.2 [39.1-39.3]       | 96.1 [93.8-97.5]       | 21.6 [18.5-24.7]       | 5,65E-04   | 2,99E-07 *  | 2,87E-06 *  |
| Butyl acetate              | E9    | 23.5 [23.4-23.6]       | 39.3 [39.1-39.5]       | 5.4 [5.2-5.5]          | 3,76E-09 * | 1,42E-08 *  | 1,87E-09 *  |
| Isoamyl acetate            | E10   | 20.6 [20.4-20.9]       | 24.3 [24.2-24.5]       | 12.8 [11.1-14.4]       | 1,12E-03   | 1,63E-05 *  | 2,39E-04 *  |
| Ethyl pentanoate           | E11   | 11.1 [10.8-11.4]       | 39.5 [39.1-40]         | 2.3 [2.1-2.6]          | 1,66E-06 * | 2,53E-08 *  | 7,24E-09 *  |
| trans-Ethyl-2-butenolate   | E12   | 22.8 [22.6-22.9]       | 32.9 [32.9-33]         | 7.7 [7.6-7.8]          | 2,10E-09 * | 2,62E-09 *  | 1,17E-10 *  |
| Pentyl acetate             | E13   | 15.7 [15.4-15.9]       | 1750.9 [1732.5-1766.3] | 7.6 [7.4-7.8]          | 9,24E-07 * | 3,04E-09 *  | 2,98E-09 *  |
| Methyl hexanoate           | E14   | 632.9 [630.1-635.8]    | 4937.7 [4898.2-4959]   | 183.3 [182.9-183.7]    | 1,02E-09 * | 1,93E-10 *  | 1,27E-10 *  |
| Ethyl hexanoate            | E15   | 2968.9 [2944.4-2998.8] | 11.7 [11.1-11.7]       | 555.7 [537.5-573.7]    | 1,66E-08 * | 3,14E-09 *  | 7,76E-07 *  |
| Isoamyl butyrate           | E16   | 3.8 [3.6-6.4]          | 1387.8 [1381.2-1391.7] | 3.4 [2.5-3.7]          | 9,56E-02   | 6,45E-11 *  | 6,20E-11 *  |
| Hexyl acetate              | E17   | 570.2 [568.6-570.5]    | 10.7 [10.1-11.3]       | 458.2 [441.9-475.4]    | 2,73E-04   | 1,47E-12 *  | 1,10E-06 *  |
| Methyl 2-hexenoate         | E18   | 4.2 [4.1-4.2]          | 148.7 [148.5-148.9]    | 2.4 [2.2-2.6]          | 6,44E-05 * | 3,43E-13 *  | 2,00E-12 *  |
| cis-3-Hexen-1-ol acetate   | E19   | 69.8 [66.3-70.3]       | 5566.5 [5538.9-5592.4] | 85.8 [85-86.9]         | 4,61E-05 * | 2,71E-10 *  | 2,73E-10 *  |
| trans-2-Hexen-1-ol acetate | E20   | 1633.3 [1620.6-1644.4] | 58.3 [56.9-59.5]       | 1849.7 [1843.9-1855.5] | 6,65E-06 * | 1,62E-09 *  | 5,13E-11 *  |
| Ethyl 2-hexenoate          | E21   | 29.7 [29.4-30.0]       | 47.4 [39.8-53.7]       | 12.6 [12.2-13.0]       | 2,21E-07 * | 7,30E-03    | 5,90E-04    |

|                                  |      |                        |                        |                        |            |            |            |
|----------------------------------|------|------------------------|------------------------|------------------------|------------|------------|------------|
| Methyl octanoate                 | E22  | 12.7 [12.5-13]         | 55.4 [54.1-56.8]       | 5.6 [5.5-5.7]          | 1,28E-07 * | 3,40E-07 * | 1,83E-07 * |
| Hexyl isobutyrate                | E23  | 64.9 [64.8-65.0]       | 46.7 [41.8-51.6]       | 9.9 [9.7-10.2]         | 1,35E-10 * | 2,79E-03   | 1,89E-04 * |
| Hexyl butyrate                   | E24  | 0 [0-0]                | 210.5 [205.8-215.3]    | 64.2 [63.5-64.5]       | 3,48E-10 * | 1,66E-07 * | 7,08E-07 * |
| Ethyl octanoate                  | E25  | 42.7 [42.5-42.8]       | 82.2 [81.9-82.6]       | 14.8 [13.8-15.9]       | 1,05E-06 * | 3,40E-09 * | 3,48E-08 * |
| trans-2-Hexenyl butyrate         | E26  | 100.3 [99.8-100.8]     | 458.7 [457-460.6]      | 100.0 [99.1-100.9]     | 5,12E-01   | 4,32E-10 * | 5,67E-10 * |
| Ethyl 3-hydroxybutyrate          | E27  | 6.2 [6.1-6.2]          | 15.9 [15.4-16.1]       | 3.3 [3.0-3.8]          | 6,91E-05 * | 5,15E-07 * | 6,88E-07 * |
| Methyl 3-(methylthio) propionate | E28  | 4.3 [4.1-4.5]          | 19.2 [19.2-19.7]       | 1.8 [1.3-2.4]          | 1,32E-03   | 5,48E-08 * | 5,63E-07 * |
| Ethyl-3-methyl thiopropionate    | E29  | 22.7 [22.7-22.8]       | 77.4 [76.4-78.5]       | 6.7 [6.6-6.7]          | 4,10E-11 * | 7,00E-08 * | 2,49E-08 * |
| Hexyl hexanoate                  | E31  | 58.6 [58.6-58.6]       | 118.9 [117.6-120.4]    | 16.4 [16.3-16.8]       | 1,81E-10 * | 1,58E-07 * | 1,91E-08 * |
| Ethyl 3-hydroxyhexanoate         | E33  | 37.6 [37.5-37.7]       | 66.1 [63.7-68.6]       | 8.3 [8.2-8.4]          | 8,48E-11 * | 3,21E-05 * | 1,92E-06 * |
| Benzyl acetate                   | E34  | 0 [0-0]                | 102.9 [100.3-105.8]    | 32.3 [31.2-32.9]       | 1,08E-07 * | 2,84E-07 * | 1,43E-06 * |
| Ethyl cinnamate                  | E35  | 36.4 [36.3-36.5]       | 35.7 [35.2-35.8]       | 7.3 [7.2-7.4]          | 2,39E-10 * | 2,48E-03   | 1,80E-09 * |
| Hexanal                          | Ald1 | 19.2 [19.1-19.4]       | 75.0 [73.0-77.0]       | 11.6 [10.7-12.6]       | 1,43E-04 * | 9,94E-07 * | 8,86E-07 * |
| 2-Hexenal                        | Ald2 | 150.6 [32.3-153.9]     | 1509.4 [1506.6-1514.0] | 261.0 [257.3-264.5]    | 3,62E-03   | 4,79E-07 * | 3,74E-11 * |
| Nonanal                          | Ald3 | 15.9 [15.8-16.0]       | 0 [0-0]                | 0 [0-0]                | 6,92E-11 * | 6,92E-11 * | 1,00E+00   |
| Benzaldehyde                     | Ald4 | 32.4 [32.4-32.4]       | 63.6 [60.8-64.3]       | 3.5 [3.2-3.7]          | 6,13E-10 * | 1,46E-06 * | 1,02E-07 * |
| Dodecanal                        | Ald5 | 0 [0-6.7]              | 45.2 [44.5-45.7]       | 6.1 [6.0-6.7]          | 3,06E-02   | 5,40E-06 * | 1,15E-08 * |
| Hexanol                          | Al1  | 93.9 [92.1-95.8]       | 381.0 [373.8-387.8]    | 88.0 [86.3-89.8]       | 1,33E-02   | 2,31E-07 * | 2,07E-07 * |
| trans-3-Hexen-1-ol               | Al2  | 3.6 [3.5-3.8]          | 21.2 [21.1-21.5]       | 5.3 [5.0-5.8]          | 2,80E-04   | 2,63E-09 * | 5,15E-08 * |
| cis-3-Hexen-1-ol                 | Al3  | 7.3 [7.1-7.6]          | 14.2 [12.6-14.7]       | 7.2 [7.1-7.8]          | 9,93E-01   | 6,36E-05 * | 6,98E-05 * |
| trans-2-Hexen-1-ol               | Al4  | 133.9 [133.1-134.2]    | 694.4 [663.5-719.1]    | 100.4 [99.9-100.8]     | 1,64E-08 * | 2,20E-06 * | 1,75E-06 * |
| Octanol                          | Al5  | 0 [0-0]                | 0 [0-0]                | 1.2 [1.1-1.2]          | 9,59E-07 * | 1,00E+00   | 9,59E-07 * |
| Propanoic acid                   | Ac1  | 6.9 [6.9-7.0]          | 0 [0-0]                | 0 [0-0]                | 1,74E-09 * | 1,74E-09 * | 1,00E+00   |
| 2-Methylpropionic acid           | Ac2  | 10.5 [10.3-10.8]       | 23.1 [23-23.3]         | 0 [0-0]                | 1,22E-07 * | 7,83E-08 * | 1,08E-10 * |
| Butyric acid                     | Ac3  | 19.3 [18.9-19.7]       | 23.8 [21.3-24.9]       | 4.8 [4.3-5.0]          | 9,40E-07 * | 5,08E-03   | 1,36E-05 * |
| 2-Methylbutanoic acid            | Ac4  | 181.1 [180.8-181.9]    | 376.4 [372.8-382.5]    | 50.2 [48.5-51.9]       | 1,52E-08 * | 3,38E-08 * | 5,33E-09 * |
| Heptanoic acid                   | Ac6  | 8.3 [8.3-8.3]          | 14.4 [13.3-15.8]       | 2.5 [2.1-2.8]          | 1,45E-06 * | 6,51E-04   | 4,67E-05 * |
| Octanoic acid                    | Ac7  | 485.7 [484.1-487.3]    | 709.2 [706.5-709.9]    | 114.7 [112.7-116.7]    | 1,43E-09 * | 3,74E-09 * | 1,47E-10 * |
| Nonanoic acid                    | Ac8  | 4491.6 [4490.9-4495.2] | 6582.9 [6581.9-6586.3] | 1367.9 [1365.1-1368.7] | 6,36E-14 * | 5,14E-13 * | 9,84E-15 * |

|                     |      |                     |                        |                     |            |            |            |
|---------------------|------|---------------------|------------------------|---------------------|------------|------------|------------|
| Decanoic acid       | Ac9  | 186.2 [183.3-189.3] | 190.5 [190.3-190.6]    | 19.5 [19.2-19.7]    | 5,98E-08 * | 6,39E-02   | 1,37E-12 * |
| Undecanoic acid     | Ac10 | 64.7 [64.3-65.2]    | 16.2 [12.7-19.8]       | 1.2 [1.1-1.2]       | 9,75E-10 * | 1,86E-05 * | 1,77E-03   |
| Benzoic acid        | Ac11 | 166.5 [166.4-166.6] | 132.2 [132.0-132.5]    | 13.5 [13.2-13.5]    | 1,39E-13 * | 3,24E-10 * | 3,63E-12 * |
| cis Linalol oxide   | T2   | 28.4 [28.0-28.8]    | 60.3 [57.9-62.7]       | 41.8 [40.8-42.7]    | 2,16E-05 * | 2,08E-05 * | 2,25E-04 * |
| trans Linalol oxide | T3   | 76.5 [76.1-76.7]    | 266.0 [264.2-268.4]    | 129.6 [129.5-129.9] | 2,41E-10 * | 5,65E-09 * | 2,12E-08 * |
| Linalool            | T4   | 350.9 [350.7-351.3] | 1249.4 [1233.2-1265.7] | 302.1 [300.0-313.0] | 5,28E-05 * | 6,52E-08 * | 6,17E-08 * |
| β-Farnesene         | T5   | 4.6 [4.3-4.9]       | 7.8 [7.6-8.0]          | 1.7 [1.5-1.9]       | 1,29E-04 * | 6,81E-05 * | 2,74E-06 * |
| β-Damascenone       | T7   | 96.0 [95.3-96.8]    | 215.2 [214.7-215.7]    | 52.5 [52.0-52.9]    | 1,08E-07 * | 1,41E-09 * | 1,21E-10 * |
| Nerolidol           | T8   | 57.0 [54.5-57.2]    | 83.2 [80.5-86.5]       | 12.1 [12.0-15.8]    | 1,05E-06 * | 6,00E-05 * | 1,59E-06 * |
| Mesifuranne         | F1   | 233.8 [233.6-233.9] | 366.1 [361.2-368.2]    | 422.9 [422.5-423.3] | 7,25E-12 * | 1,04E-07 * | 2,92E-06 * |
| Furaneol            | F2   | 11.4 [11.3-101.6]   | 13.3 [10.7-16.0]       | 3.9 [3.7-4.0]       | 1,32E-01   | 2,49E-01   | 2,83E-03   |
| γ-Jasmolactone      | F3   | 136.5 [135.8-137.0] | 63.7 [62.8-63.9]       | 7.2 [7.0-7.4]       | 2,95E-10 * | 3,18E-09 * | 8,93E-10 * |
| γ-Octalactone       | L1   | 833.3 [828.9-838.2] | 1663.1 [1650.6-1675.6] | 281.1 [279.9-281.7] | 2,79E-09 * | 4,30E-08 * | 4,40E-09 * |
| γ-Decalactone       | L2   | 15.3 [14.8-17.2]    | 17.3 [15.9-18.4]       | 3.2 [3.1-3.8]       | 9,69E-06 * | 9,31E-02   | 3,17E-05 * |
| γ-Dodecalactone     | L3   | 142.3 [140.3-142.5] | 0 [0-0]                | 0 [0-0]             | 4,26E-10 * | 4,26E-10 * | 1,00E+00   |
| Phenol              | O1   | 4.6 [4.3-4.9]       | 8.3 [8.2-8.7]          | 3.4 [2.7-4.1]       | 3,71E-02   | 2,97E-05 * | 1,82E-04 * |
